# Supplementary material for: Mere Ownership Effect Is Equally Pronounced in Material and Immaterial Objects
Source: Atypon-hosted journal article supplement (doi:10.1027/1864-9335/a000467), 2021-11-01
Supplement: 1864-9335_a000467_esm2.pdf [file 1864-9335_a000467_esm2.pdf]

**Electronic Supplementary Material 2**

| Player | Clue                                                         | John | The daughter | Constance | Angus |
|--------|--------------------------------------------------------------|------|--------------|-----------|-------|
| 1      | 1. Cloths covered with blood in the room on the second floor |      |              |           | -1    |
|        | 2. "the jew..." exclamation                                  | +1   | ?            |           |       |
|        | 3. University scandal between Tannenbaum & McClayne          | +1   | ?            |           |       |
| 2      | 1. Regular sized shoes                                       | -1   |              |           |       |
|        | 2. Speaking foreign language                                 |      | ?            | +1        |       |
|        | 3. Not accepting Tannenbaum sleeping with someone else       |      | ?            | +1        |       |
| 3      | 1. Murderer's name starts with „Mc“                          |      |              | -1        |       |
|        | 2. Constance was the reason                                  |      | ?            | -1        | +1    |
|        | 3. Beginning new academic year in Pennsylvania               |      | ?            |           | +1    |

+1 = clue suggesting this person; -1 = clue giving alibi to this person; ? = clue implicitly fits

- 1.1. Angus did not sleep on the 2<sup>nd</sup> floor nor had access to the room where the cloths were found
- 1.2. Calling someone 'the jew' as a slur is the most probable for someone who is anti-Semite (or was raised by an anti-Semite; the daughter not only without a father for a while, because he was serving a sentence for beating a jewish client, but also a jewish professor took advantage of her)
- 1.3. Names 'Tannenbaum' and 'McClayne' in an article on scandal at the Pennsylvania university suggest the deceased and explicitly mentioned by his name owner of the guesthouse (but also fits to the owner's daughter, who happens to be a student, so her presence at the university is even more plausible); Constance Tannenbaum did not work at Pennsylvania, but in Cambridge.
- 2.1. Regular sized shoes cannot have been worn by John 'Bigfoot'
- 2.2. Constance Tannenbaum is known for her fluency in Dutch, knowing a foreign language by McGyver, an Englishman working in the US, or John McClayne, an American without education living

## Electronic Supplementary Material 2

in the US, is not that probable (however, a daughter of a German mother might be well acquainted with this language)

2.3. There are two primary types of people who can have trouble with a man sleeping 'with someone else' – wives and lovers, who were told that the lover's marriage is dead and will soon end

3.1. Only Constance Tannenbaum (born as Constance Vikander) has nothing to do with "Mc" in her surname.

3.2. If Constance was the reason of the murder, it could be said by Constance's previous partner, for she was stolen from him by the deceased; but the Tannenbaum's lover also could have said that Tannenbaum staying with his wife and bringing Constance to McClayne family's guesthouse after reputation-ruining scandal from a year before was the reason for the murder; **however, this item unintentionally suggests that it wasn't Constance who committed the crime**; on the other hand, Constance still was chosen more often than John as the murderer by the groups who failed to point at the true killer, so the ecological influence of this error is not extremely influential

3.3. Since John was an uneducated guesthouse owner from another state, and Constance was said to be a lecturer in Cambridge, professor Tannenbaum could have been at a new academic year inauguration in Pennsylvania only either with his colleague, Angus McGyver, or his student – McClayne's daughter
