# Supplementary material for: Mere Ownership Effect Is Equally Pronounced in Material and Immaterial Objects
Source: Atypon-hosted journal article supplement (doi:10.1027/1864-9335/a000467), 2021-11-01
Supplement: 1864-9335_a000467_esm3.pdf [file 1864-9335_a000467_esm3.pdf]

### Electronic Supplementary Material 3

#### Instructions

You are about to impersonate private detectives investigating a murder. It took place in the United States. Your task is to solve the crime mystery. Each of you received the same state of events description, called “Shared information”. Additionally, each of you were presented with their unique clue set regarding the murder. Please get acquainted with both shared and unshared information, and then begin a discussion that aims to discover the identity of the murderer.

The whole game lasts for 25 minutes - you have five minutes to read the data below, 15 minutes to debate collectively, and then five more minutes to fill a short questionnaire and inquire about the study.

You **can not** directly read the content of the unshared information, but you can freely describe it in your own words. You are **allowed** to get back to your shared and unshared information after the debate starts. If you want, you may take notes individually or together as a group. After the consensus within the group is reached in terms of the murderer’s identity, please call the research assistant and share the decision with him/her. The maximum time for the discussion is 15 minutes. After 10 and 14 minutes, you will be reminded about the remaining time.

After you read your unshared information, write down the name of a person that is your primary suspect.

For participation, each of you will be remunerated with 10zł. If your group succeeds in selecting the true murderer, you will get an additional 15zł.

#### *Additional information shared with the Polish sample*

Attention – regarding the rules of the Polish language, we could not omit the gender of the nouns and the verbs used in the shared and unshared information sections, as well as the proverbs that suggest a certain gender of the perpetrator. The grammatical forms of words that we used are not a clue that may help you identify the murderer. Please don’t let that distract you.

#### Shared information

The body was found on Wednesday at 7 a.m., in the living room on the ground floor at the “Good Life” guesthouse in the suburbs of Los Angeles. The deceased was identified as Jacob Tannenbaum, born in Israel, who was a professor at the university in Pennsylvania. He was 45 years old at the moment of death and he resided in the guesthouse due to the nearby scientific conference. In the guesthouse, there are two rooms currently occupied on the second floor and one more occupied on the third floor. In the first apartment on the second floor lives the owner of the guesthouse, John

'Bigfoot' McClayne, 53 years old, with primary education, a widower (his wife was from Germany), with his 21-years-old, studying daughter. The nickname 'Bigfoot' originates from the enormous size of his feet. John is an anti-Semite, and in the previous year, he finished his lasting for a couple of years sentence in prison. He was sentenced for brutally beating his tenant, after discovering he was of Jewish origin. In the second apartment on the second floor lived professor Jacob Tannenbaum with his wife, Constance Tannenbaum, née Vikander, 30 years old, with a Ph.D. in the dutch language in which she excels, teaching at the Cambridge University. On Tuesday a fierce fight between the spouses was heard, and their room went silent long after midnight. The third floor's apartment is occupied by professor Angus McGyver, an Englishmen, peer to Jacob Tannenbaum, with whom he worked at the university in Pennsylvania. Years ago professor Tannenbaum stole McGyver's fiancée – his wife Constance Tannenbaum.

For Player 1, insinuating John as a murderer, material version

In your evidence bag, you've placed the murderer's clothes covered in blood, found in the corner of a wardrobe in one of the rooms on the second floor. There is also a recording tape in your bag, on which you've recorded the murderer shouting that 'the Jew has destroyed his/her life'. In the suitcase of the victim, you have found a newspaper from last year, with an article covering the subject of a scandal at the university in Pennsylvania. There is a picture printed in the article, with Tannenbaum and McClayne in it.

For Player 1, insinuating John as a murderer, immaterial version

The police officers who arrived at the crime scene first have told you that the murderer's clothes covered in blood have been found in the corner of a wardrobe in a room on the second floor. You have listened to a tape recording, on which the murderer shouts that that 'the Jew has destroyed his/her life'. On the internet, you have found an online article about a scandal at the university in Pennsylvania from last year. There is a picture uploaded to the article, with Tannenbaum and McClayne in it.

For Player 2, insinuating Constance as a murderer, material version

In your possession, as evidence in the case, there are entirely normal shoes in a regular size, covered in the victim's blood. On a flash memory stick that you have in your pocket, you have a recording from the interrogation room, on which the murderer, stressed, starts fluently speaking in a foreign, different than English, language. In the Tannenbaums' room, you have found a love letter addressed to professor Jacob, in which he is accused of sleeping with someone else.

For Player 2, insinuating Constance as a murderer, immaterial version

You've received information from the police lab that currently they are analyzing evidence from your crime scene – a pair of shoes covered in the victim's blood. They don't know much yet, except that the shoe size is regular. In the interrogation room you've heard the murderer, stressed, speaks fluently in a foreign, different than English, language. The murderer has told you off the record that he/she has never accepted the fact that Tannenbaum was sleeping with someone else.

For Player 3, insinuating Angus as a murderer, material version

You've taken a picture of the crime scene – while dying, professor Tannenbaum started writing with his blood on the floor the name of the murderer. In your picture, you can see bloody letters "Mc...". In your briefcase you have a report from the interrogation with the murderer. According to that, he/she said the murder wouldn't have happened if it wasn't for Constance. You've received as evidence the murderer's mobile phone. In its photo gallery, there is a picture of the murderer and Tannenbaum on the campus of the university in Pennsylvania, with a description 'Vivat Academia – we're starting a new academic year together'.

For Player 3, insinuating Angus as a murderer, immaterial version

It is known to you that the deceased started writing with his blood the name of the murderer on the floor and that he has managed to write "Mc..." before he died. You have interrogated the murderer who told you that the murder wouldn't have happened if it wasn't for Constance. The technical analyst has confirmed to you during a phone call that on the murderer's mobile phone there is a picture of the murderer and Tannenbaum on the campus of the university in Pennsylvania, with a description "Vivat Academia – we're starting a new academic year together".
